# Supplementary material for: Liposomes derivatized with tetrabranched neurotensin peptides via click chemistry reactions
Source: Royal Society of Chemistry journal article supplement (doi:10.1039/c3nj00596h), 2013-01-01

## New Journal of Chemistry

### **Liposomes derivatized with tetrabranched Neurotensin peptide via click chemistry reactions**

**Antonella Accardo, Paola Ringhieri, Diego Tesauro and Giancarlo Morelli\***

*Department of Pharmacy, CIRPeB, University of Naples "Federico II", & IBB CNR, Via Mezzocannone 16, 80134 Naples, Italy*

Electronic Supplementary Information

**(C18)<sub>2</sub>-Peg9-N<sub>3</sub>** <sup>1</sup>H NMR spectrum recorded at 400 MHz in CDCl<sub>3</sub>/CD<sub>3</sub>OD 50:50 CHCl<sub>3</sub> internal standard:

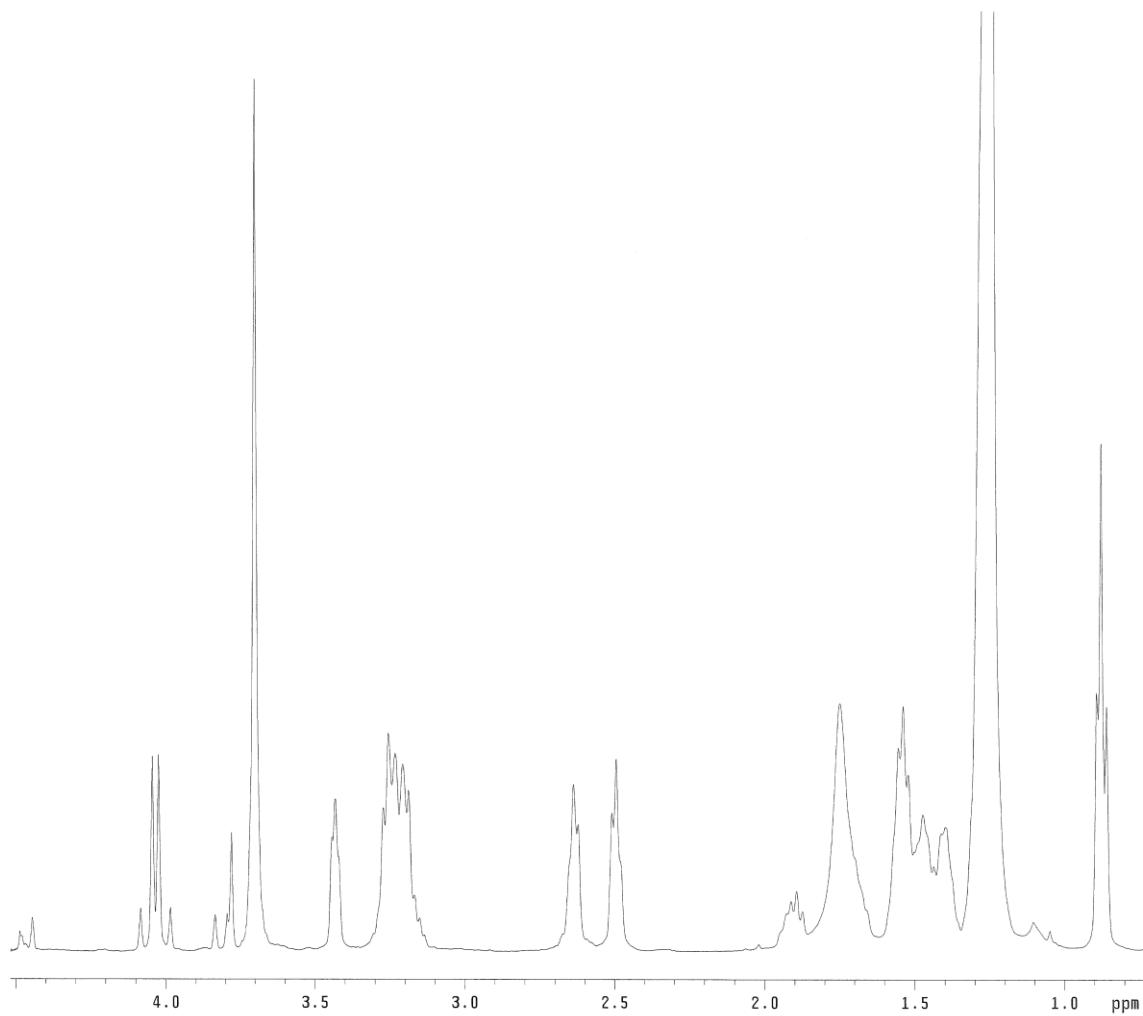

(C18)<sub>2</sub>-Peg9-N<sub>3</sub> <sup>13</sup>C NMR spectrum recorded at 100.512 MHz, in CDCl<sub>3</sub>/CD<sub>3</sub>OD 50:50 CDCl<sub>3</sub> internal standard

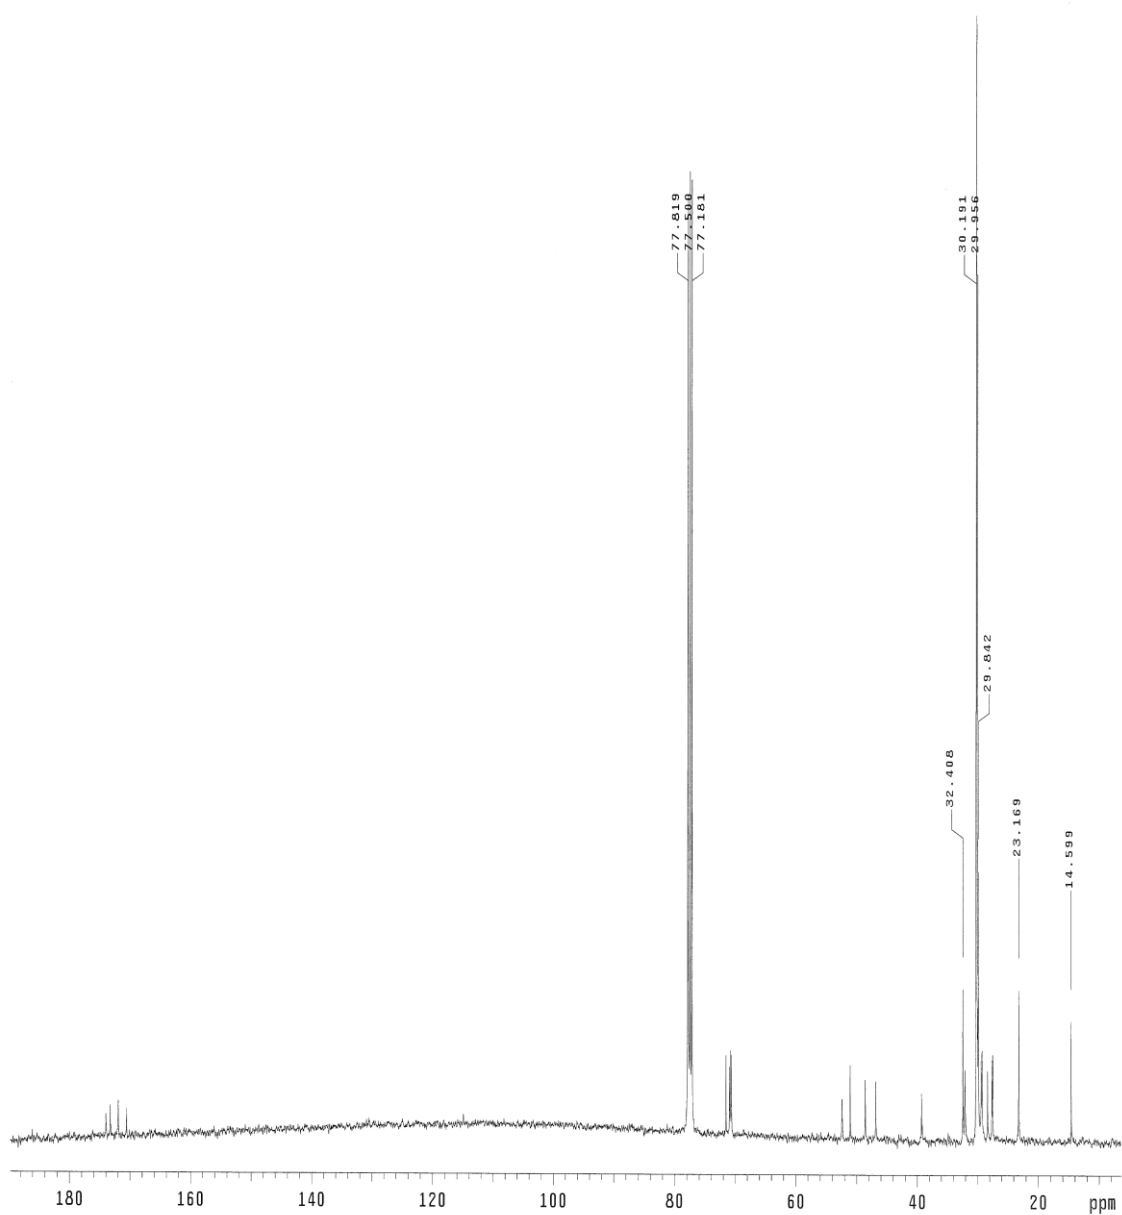

Supplement: c3nj00596h.pdf [file c3nj00596h.pdf]
